# Supplementary material
Source: publisher figshare collection journal article supplement (https://springernature.figshare.com/ndownloader/files/21101814)
Supplement: Supplementary file [file 21101814]

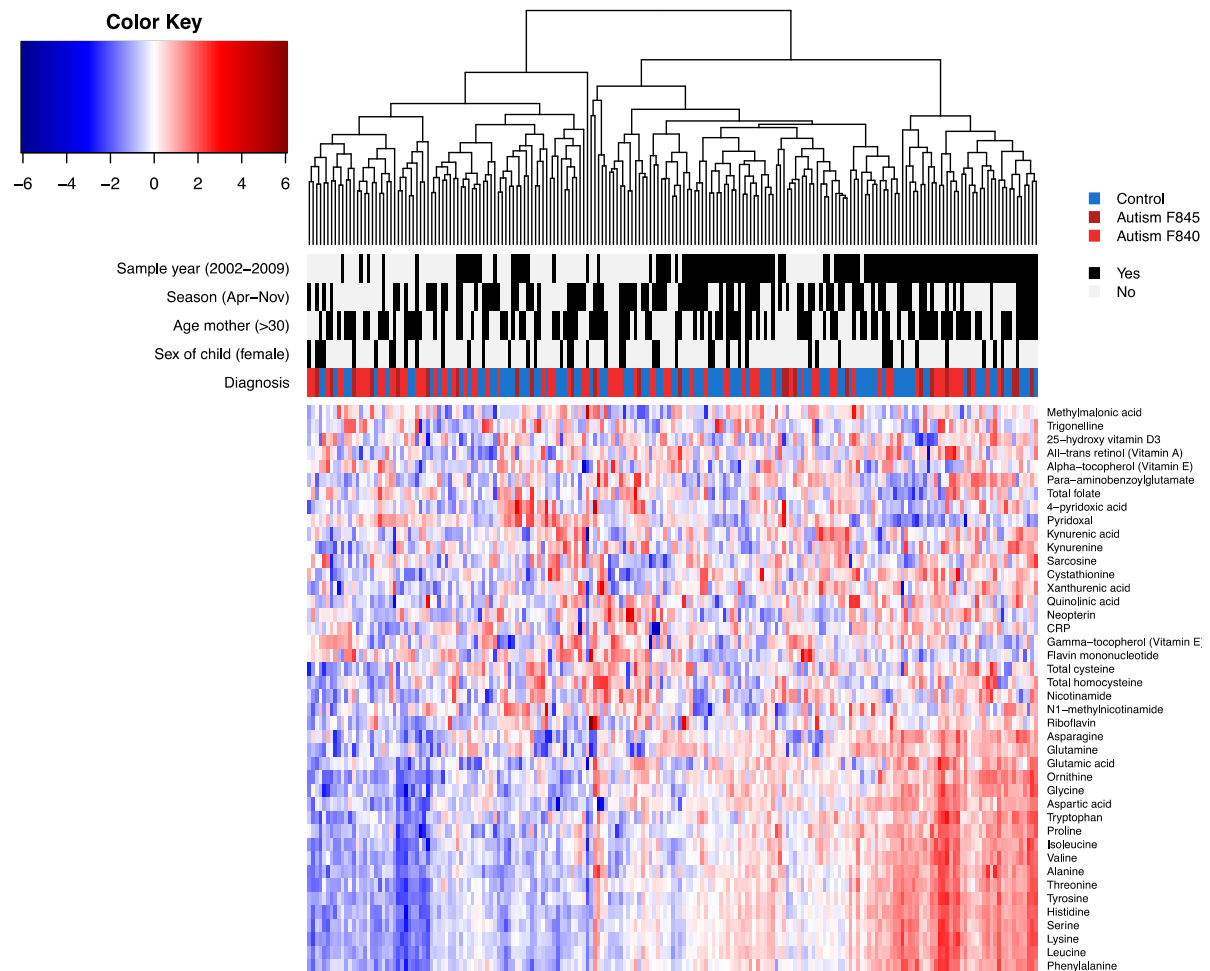

**Supplementary Figure 3.** Biomarker levels in each study participant, with a hierarchical cluster analysis based on Euclidian distances with complete linkage. Each column represents a participant, and each row a biomarker. Heat map colors represent standardized log-transformed biomarker levels, ranging from above the mean biomarker levels in all participants (red) and below mean biomarker levels (blue).
